FEBRUARY 2015 | VOLUME 66 | NUMBER 2

# Psychiatric Services

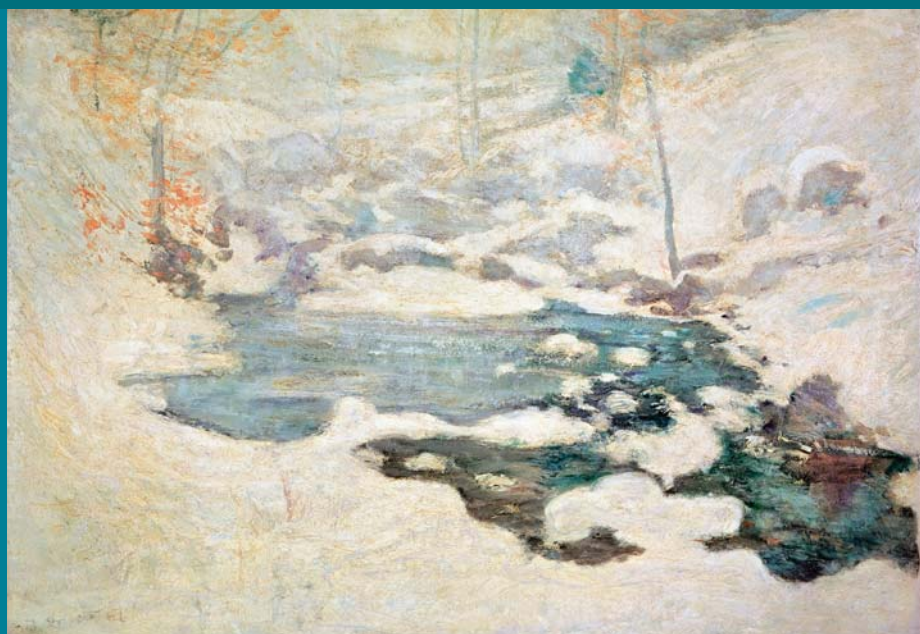

Factors Associated With Suicide in the Month After a Health Service Contact

Clozapine Monotherapy and Reduced Costs Among Medicaid Enrollees

The Role of Psychiatric Comorbidities in 30-Day Hospital Readmissions

Use of a Patient Decision Aid for PTSD: A Randomized Controlled Trial

A Journal of the American Psychiatric Association  
[ps.psychiatryonline.org](http://ps.psychiatryonline.org)
