# New Look and Features for *Psychiatric Services*!

We have enhanced *Psychiatric Services* with a bold new look and engaging features!

## Psychiatric Services

Designed with the reader in mind, each issue will now have a more informative Table of Contents that provides a quick takeaway for each article to help you quickly determine items to turn to or mark for later reading.

In addition, symbols on the Table of Contents page and on the articles themselves will help you navigate to content that addresses the Core Competencies as defined by the Accreditation Council of Graduate Medical Education (ACGME) and the American Board of Medical Specialties (ABMS).

This improved reader experience continues at the journal's online portal. The homepage will feature the latest articles as soon as they are published, pushing front and center the cutting-edge research that media stories are featuring.

And now more content is being highlighted with video! Each month, Editor Howard Goldman is featured in a brief video in which he discusses each issue's key articles and themes.

Our online portal is also where, through 65 years of back content, you can see how *Psychiatric Services* has been and will continue to be chronicling the transformation of health care services delivery.

We are excited to be bringing these enhancements to you.

[ps.psychiatryonline.org](http://ps.psychiatryonline.org)

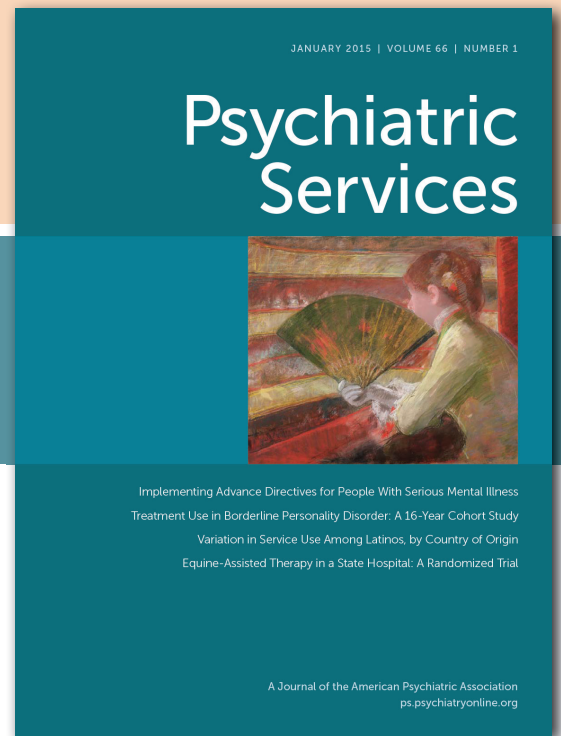

### Core Competencies

-  Professionalism
-  Patient Care and Procedural Skills
-  Medical Knowledge
-  Practice-based Learning and Improvement
-  Interpersonal and Communication Skills
-  Systems-based Practice

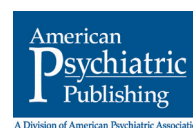

Web: [www.appi.org](http://www.appi.org)  
Phone: 1-800-368-5777  
Email: [appi@psych.org](mailto:appi@psych.org)

Priority Code AH1502
