## 2016 Isaac Ray Award

The American Psychiatric Association and the American Academy of Psychiatry and the Law invite nominations for the Isaac Ray Award for 2016. This award honors Dr. Isaac Ray, one of the original founders and the fourth President of the American Psychiatric Association, and is presented to a person who has made outstanding contributions to forensic psychiatry or to the psychiatric aspects of jurisprudence. The award, which will be presented at the Convocation of Fellows at the Annual Meeting of the American Psychiatric Association in Atlanta, Georgia, in May 2016, includes an honorarium of \$1,500.

*Nominations are requested as follows: (1) a primary nominating letter (sent with the consent of the candidate), which includes a curriculum vitae and specific details regarding the candidate's qualifications for the award, and (2) a supplemental letter from a second nominator in support of the candidate. Additional letters related to any particular candidate will not be accepted or reviewed by the Award Committee. Nominators should not submit letters on behalf of more than one candidate.*

The deadline for receipt of nominations is **May 1, 2016**. Nominations will be kept in the pool of applicants for two years.

Nominations, as outlined above, should be submitted to:  
Isaac Ray Award Committee  
c/o Lori Klinedinst, Staff Liaison  
American Psychiatric Association  
1000 Wilson Boulevard, Suite 1825  
Arlington, VA 22209  
E-mail: [advocacy@psych.org](mailto:advocacy@psych.org)

## Leading the way

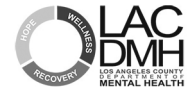

"I was attracted by the opportunity to do Telepsychiatry with DMH; it's the first time it's ever been done in an urban setting."

*Amber Kondor, MD  
General Psychiatrist*

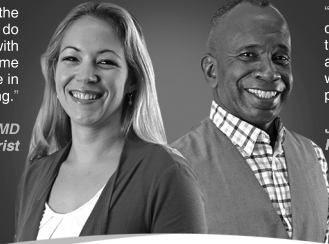

"It's a large, dynamic department, just like the city... It affords me an opportunity to work with a lot of different people."

*James R. Jones, MD  
Regional Medical*

Join the largest, most dynamic mental health department in the nation. We are creating the future of mental health services, and we are seeking physicians who are ready to join our team and push the boundaries of traditional community practice.

To learn more about employment as a psychiatrist with the Los Angeles County Department of Mental Health, including salary and benefits, please visit:

[www.psychiatristjobs.la](http://www.psychiatristjobs.la)

## There's So Much More to **PSYCHIATRIC SERVICES** Than Meets the Page!

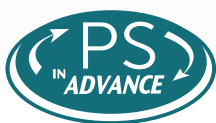

### *Psychiatric Services in Advance*

*Latest research reports!*

#### **Primary Care-Based Medical Homes**

North Carolina's 15-year history with Medicaid medical homes may provide lessons for other states phasing similar models into their Medicaid programs.

#### **Impact of Patients' Psychiatric Hospitalization on Caregivers: A Systematic Review**

Caregivers often report distress when a loved one is hospitalized, along with stigma, economic strain, and relationship changes. Nonetheless, many also experience positive changes as a result of the hospitalization.

*Revisit the field's rich history!*

#### **50 Years Ago in Psychiatric Services**

- Brief Inpatient Treatment: A Pilot Study
- The Psychosis-Prone Personality
- *Games People Play*: A Review

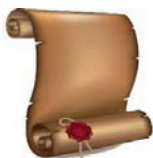

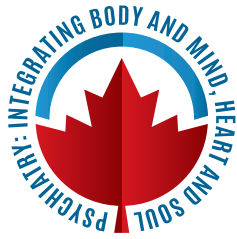

# AMERICAN PSYCHIATRIC ASSOCIATION 168<sup>TH</sup> ANNUAL MEETING

Toronto, Canada • May 16-20, 2015

Join colleagues from across the U.S. and around the world for the psychiatry event of the year!

## Why You Should Attend:

- ▶ Discover cutting-edge science and new therapies.
- ▶ Learn from renowned leaders in science and health policy.
- ▶ Connect with your peers and expand your professional network.
- ▶ Earn your annual licensure CME credit at one meeting!
- ▶ Explore the Exhibit Hall for innovative treatment options and new technologies.

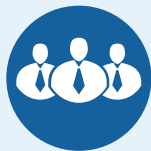

**14,000**  
Attendees

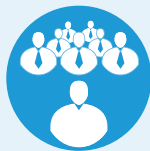

**400**  
Scientific Program  
Sessions

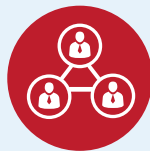

**200**  
Exhibitors

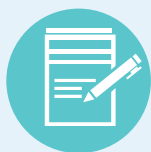

**42**  
Courses

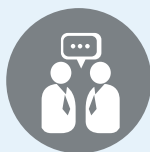

**Up to 50**  
CMEs\*

*\*The APA designates this live activity, the 168th Annual Meeting, for a maximum of 50 AMA PRA Category 1 Credits™.*

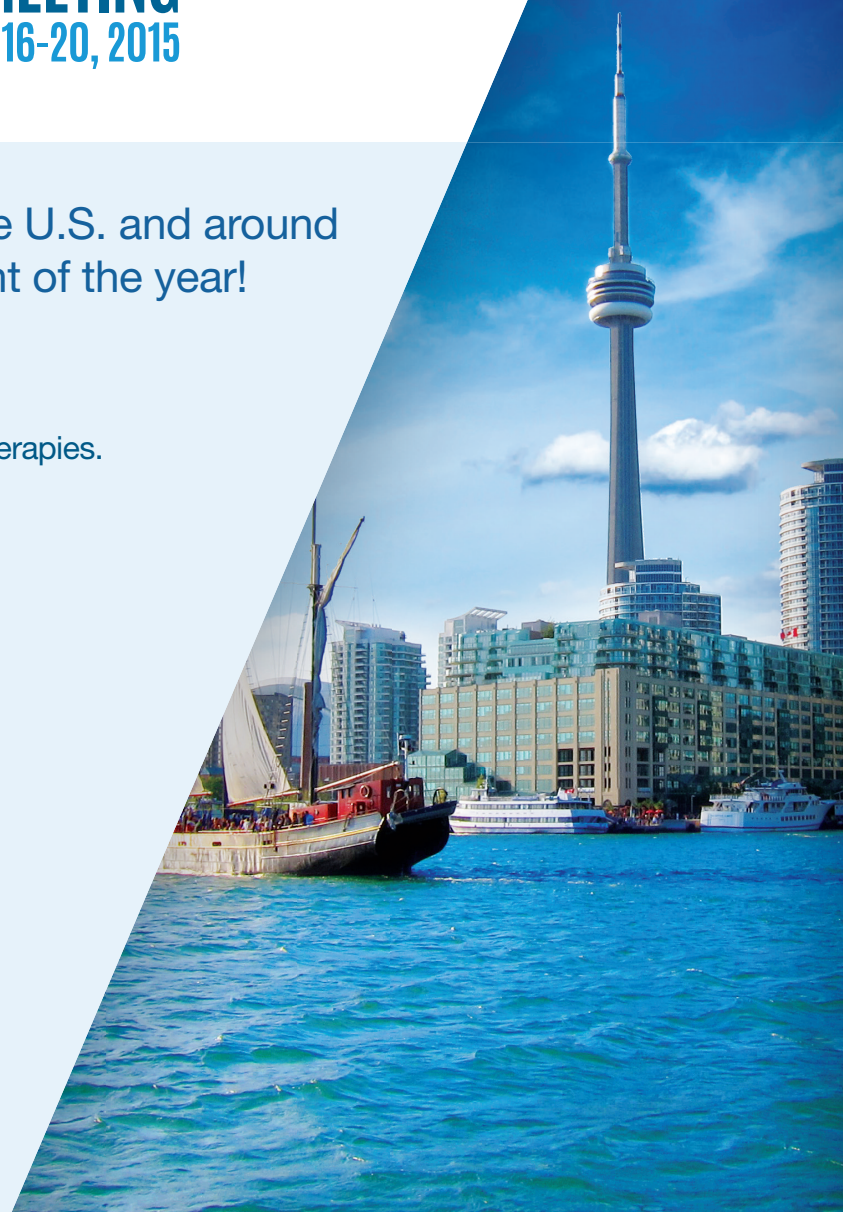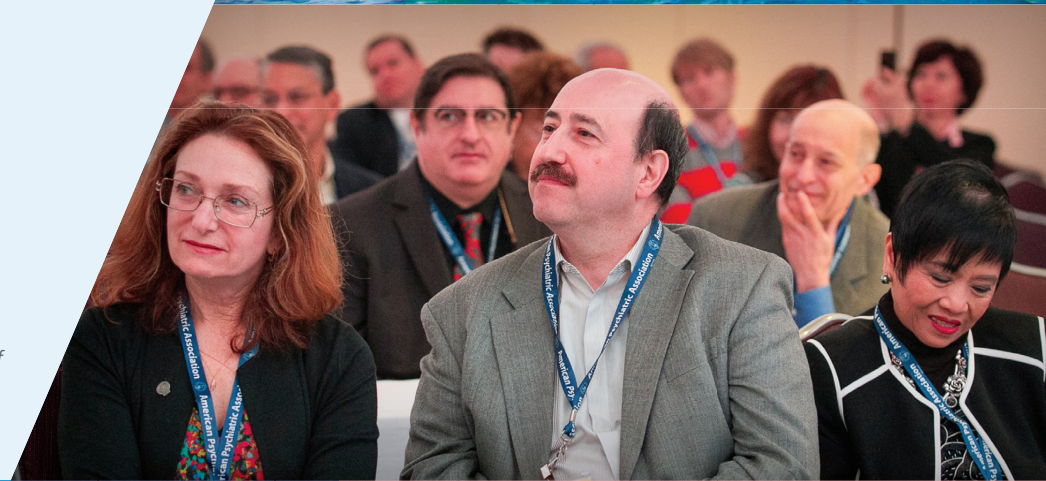

 Join: #APAAM15

To register online, visit [psychiatry.org/annualmeeting](http://psychiatry.org/annualmeeting)
